# Supplementary material
Source: Springer Nature journal article supplement (https://www.springermedizin.de/resource/supplementary/13075_2005_1661_MOESM4_ESM.pdf/9690286)

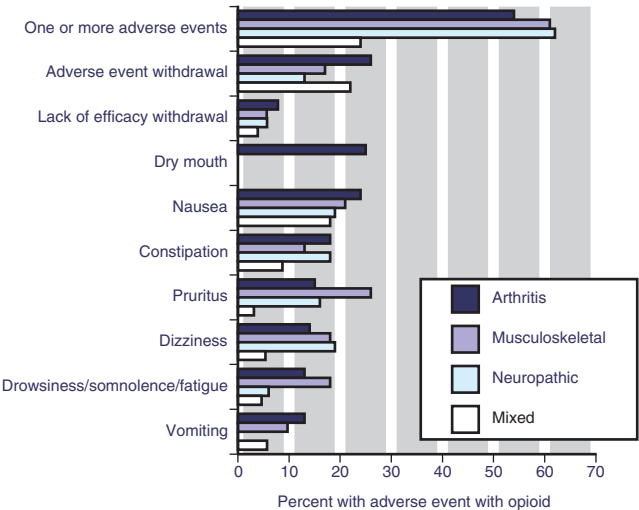

Supplement: MOESM4 [file 9690286]
